# Supplementary material
Source: publisher site journal article supplement (https://www.dovepress.com/article/275038)
Supplement: Supplementary file 1 [file get_supplementary_file.php]

Supplementary file 1

English version Questionnaire

A questionnaire for acceptance of human papillomavirus vaccination and associated factors among parents of daughters in Gondar town, Northwest Ethiopia

| Question          | Response |
|-------------------|----------|
| Questioner number |          |
| Name of Town      |          |

Part one: Socio – demographic characteristics

| S.No | Question                    | Response                                                                                                                        | Code |
|------|-----------------------------|---------------------------------------------------------------------------------------------------------------------------------|------|
| 101  | Sex                         | 1 male 2 female                                                                                                                 |      |
| 102  | Age(in year)                | -----                                                                                                                           |      |
| 103  | Marital status              | 1.Single<br>2 .Married<br>3 .Divorced<br>4 .Widowed<br>5.separeted                                                              |      |
| 104  | Education status            | 1. can't read and write<br>2.only read and write<br>3.primary school<br>4. secondary school<br>5. Diploma<br>6.Degree and above |      |
| 106  | Religion                    | 1orthoox<br>2 Muslim<br>3 protestant<br>4 others -----                                                                          |      |
| 107  | Occupation                  | 1 – civil servant<br>2 – self employed<br>3- merchant<br>4– Farmer<br>5 – House wife<br>7-others -----                          |      |
| 108  | Address                     | 1 – Urban<br>2 – Rural                                                                                                          |      |
| 109  | Number of children          |                                                                                                                                 |      |
| 110  | Number of daughter age 9-17 |                                                                                                                                 |      |

Part 2. Economic /wealth status of urban participants

| Code | Questions                                                                                 | Response                                                                                                                                           | Skip |
|------|-------------------------------------------------------------------------------------------|----------------------------------------------------------------------------------------------------------------------------------------------------|------|
|      | How much your month salary                                                                |                                                                                                                                                    |      |
|      | If your husband/wife civil servant how much his/her monthly salary in ETB                 |                                                                                                                                                    |      |
| 201  | Owner ship of the house                                                                   | 1. Private<br>2. Rented from individual<br>3. Other(specify)_____                                                                                  |      |
| 202  | Number of rooms                                                                           | _____ in number                                                                                                                                    |      |
| 203  | Main material of the dwelling floor                                                       | 1. Earth / Soil<br>2. Dung<br>3. Cement<br>4. Ceramics<br>5. Carpet<br>6. Others (specify)_____                                                    |      |
| 204  | Main material of the roof                                                                 | 1. Iron corrugated sheet<br>2. Thatch<br>3. Others (specify)_____                                                                                  |      |
| 205  | Main material of the exterior walls                                                       | 1. Stone with mud<br>2. Wood with mud<br>3. Stone with cement<br>4. Others (specify)_____                                                          |      |
| 206  | Type of fuel mainly used for household cooking                                            | 1. Electricity<br>2. Charcoal<br>3. Wood<br>4. Animal dung<br>5. Others(specify)_____                                                              |      |
| 207  | Is the cooking usually done in the house, in a separate building, or outdoors?            | 1. In a separate room used as kitchen<br>2. Elsewhere in the house<br>3. In a separate building<br>4. Outdoors<br>5. Other ( <i>specify</i> )_____ |      |
| 208  | Does any member of the household own any land that can be used for agriculture?           | 1. Yes<br>2. No _____ →                                                                                                                            | 411  |
| 209  | Ownership of the farm land (if the household doesn't have one of the two option, use 999) | 1. Own, in hectares/gemed ____<br>2. Rent, in hectares/gemed ____                                                                                  |      |
| 210  | Annual total agricultural products (includes all items)                                   | _____ kuintal                                                                                                                                      |      |
| 211  | Does your household have<br>A. Electricity?<br><br>B. A Radio?                            | Yes      No<br><br>1          0                                                                                                                    |      |

|     |                                                                                                                               |        |           |     |
|-----|-------------------------------------------------------------------------------------------------------------------------------|--------|-----------|-----|
|     | C. A Television?                                                                                                              | 1      | 0         |     |
|     | D. A Non-mobile telephone?                                                                                                    | 1      | 0         |     |
|     | E. A Refrigerator?                                                                                                            | 1      | 0         |     |
|     | F. Table?                                                                                                                     | 1      | 0         |     |
|     | G. Chair?                                                                                                                     | 1      | 0         |     |
|     | H. A bed with cotton/spring mattress                                                                                          | 1      | 0         |     |
|     |                                                                                                                               | 1      | 0         |     |
| 212 | Does any member of your household own                                                                                         |        |           |     |
|     | A. A watch?                                                                                                                   | Yes    | No        |     |
|     |                                                                                                                               | 1      | 0         |     |
|     | B. A mobile phone?                                                                                                            |        |           |     |
|     |                                                                                                                               | 1      | 0         |     |
|     | C. A bicycle?                                                                                                                 |        |           |     |
|     |                                                                                                                               | 1      | 0         |     |
|     | D. A Bajaj?                                                                                                                   |        |           |     |
|     |                                                                                                                               | 1      | 0         |     |
|     | E. Animal drawn cart?                                                                                                         |        |           |     |
|     |                                                                                                                               | 1      | 0         |     |
|     | F. Car?                                                                                                                       |        |           |     |
|     |                                                                                                                               | 1      | 0         |     |
| 213 | Does this household own any livestock, herds, other farm animals, or poultry?                                                 | 1. Yes |           |     |
|     |                                                                                                                               | 2. No  | —————→    | 415 |
| 214 | How many of the following animals does the household have? (if the household does not have the listed animal use <b>999</b> ) |        |           |     |
|     | A. Cattle, milk cows, bulls?                                                                                                  | _____  | in number |     |
|     | B. Horses, Donkeys, or mules?                                                                                                 | _____  | in number |     |
|     | C. Goats?                                                                                                                     | _____  | in number |     |
|     | D. Sheep?                                                                                                                     | _____  | in number |     |
|     | E. Chickens?                                                                                                                  | _____  | in number |     |
|     | F. Beehives?                                                                                                                  | _____  | in number |     |
| 415 | Does any member of this household have a bank account?                                                                        | 1. Yes |           |     |
|     |                                                                                                                               | 2. No  |           |     |

| Income and wealth index question for rural |                                                                                                         |                                        |                                                            |
|--------------------------------------------|---------------------------------------------------------------------------------------------------------|----------------------------------------|------------------------------------------------------------|
|                                            | Ask the household if they have any of the following livestock assets                                    | Do you have these animals 1. Yes 2. No | How many of these animals do this household currently own? |
| 201                                        | Plough oxen                                                                                             |                                        |                                                            |
|                                            | Fattened ox                                                                                             |                                        |                                                            |
|                                            | Cows                                                                                                    |                                        |                                                            |
|                                            | Heifer                                                                                                  |                                        |                                                            |
|                                            | Bull                                                                                                    |                                        |                                                            |
|                                            | Calf                                                                                                    |                                        |                                                            |
|                                            | Goats                                                                                                   |                                        |                                                            |
|                                            | Sheep                                                                                                   |                                        |                                                            |
|                                            | Donkey                                                                                                  |                                        |                                                            |
|                                            | Mule                                                                                                    |                                        |                                                            |
|                                            | Horse                                                                                                   |                                        |                                                            |
|                                            | Chicken                                                                                                 |                                        |                                                            |
|                                            | Beehive                                                                                                 |                                        |                                                            |
|                                            | Others specify                                                                                          |                                        |                                                            |
| 202                                        | Ask the household if they have any of the following crop production produced in the previous last years | 1. Yes 2. No                           | If yes how much the amount in quintals                     |
|                                            | Tefe                                                                                                    |                                        |                                                            |
|                                            | Barley                                                                                                  |                                        |                                                            |
|                                            | Wheat                                                                                                   |                                        |                                                            |
|                                            | Maize                                                                                                   |                                        |                                                            |
|                                            | Sorghum                                                                                                 |                                        |                                                            |
|                                            | Oats                                                                                                    |                                        |                                                            |
|                                            | Mixed of wheat and barley                                                                               |                                        |                                                            |
|                                            | Bean                                                                                                    |                                        |                                                            |
|                                            | Chickpea                                                                                                |                                        |                                                            |
|                                            | Lentil                                                                                                  |                                        |                                                            |
|                                            | Soya bean                                                                                               |                                        |                                                            |
|                                            | Carrot                                                                                                  |                                        |                                                            |
|                                            | Red onion                                                                                               |                                        |                                                            |
|                                            | White onion                                                                                             |                                        |                                                            |
|                                            | Potatoes                                                                                                |                                        |                                                            |
|                                            | Head cabbage                                                                                            |                                        |                                                            |
|                                            | Tomatoes                                                                                                |                                        |                                                            |
|                                            | Avocado                                                                                                 |                                        |                                                            |
|                                            | Lemon                                                                                                   |                                        |                                                            |
|                                            | Zeytun                                                                                                  |                                        |                                                            |
|                                            | Mango                                                                                                   |                                        |                                                            |
|                                            | Orange                                                                                                  |                                        |                                                            |
|                                            | Papaya                                                                                                  |                                        |                                                            |
|                                            | Peper corn                                                                                              |                                        |                                                            |
|                                            | Gesho                                                                                                   |                                        |                                                            |

|     |                                                                          |                                                                      |                     |
|-----|--------------------------------------------------------------------------|----------------------------------------------------------------------|---------------------|
|     | Sugar cane                                                               |                                                                      |                     |
|     | Coffee                                                                   |                                                                      |                     |
|     | Chat                                                                     |                                                                      |                     |
|     | Others                                                                   |                                                                      |                     |
| 203 | Dose the house hold have ?                                               |                                                                      | How much the number |
|     | 1. Functioning radio/tape                                                | 1. Yes 2. No                                                         |                     |
|     | 2. Modern beds                                                           | 1. Yes 2. No                                                         |                     |
|     | 3. Cotton /sponge/spring mattress?                                       | 1. Yes 2. No                                                         |                     |
|     | 4. Mobile /cell-phone/wireless                                           | 1. Yes 2. No                                                         |                     |
|     | 5. Water pump                                                            | 1. Yes 2. No                                                         |                     |
|     | 6. Modern stoves                                                         | 1. Yes 2. No                                                         |                     |
|     | 7. Other specify                                                         |                                                                      |                     |
| 204 | What kind of latrine dose your families have?                            | 1. None<br>2. Traditional<br>3. VIP<br>4. Other (specify)---<br>---- |                     |
| 205 | What is the type of roof of the house?                                   | 1. Corrugated sheet<br>2. Thatch roof<br>3. Other (specify)          |                     |
| 206 | How many rooms are used by this household for sleeping only?             | Number of rooms---                                                   |                     |
| 207 | do you have kitchen                                                      | 1. Yes 2. No                                                         |                     |
| 208 | Do you have separate rooms for cattle?                                   | 1. Yes 2. No                                                         |                     |
| 209 | What is the wall of your residence house made of?                        | 1. Wooden structure<br>2. Mud<br>3. Other (specify)                  |                     |
| 210 | What is the total farm size holding of the household in hectares?        | Size in hectares                                                     |                     |
| 211 | The amount of money deposited or saved in bank or other financial sector | In birr                                                              |                     |
|     |                                                                          |                                                                      |                     |

| Part 3 Knowledge about cervical cancer and its risk factors |                                                                         |                              |  |
|-------------------------------------------------------------|-------------------------------------------------------------------------|------------------------------|--|
| 301                                                         | HPV can cause cervical cancer?                                          | 1. Yes 2. No 3. I don't know |  |
| 302                                                         | HPV infections are preventable?                                         | 1. Yes 2. No 3. I don't know |  |
| 303                                                         | HPV is sexual transmitted disease?                                      | 1. Yes 2. No 3. I don't know |  |
| 304                                                         | Condom use can prevent HPV infection?                                   | 1. Yes 2. No 3. I don't know |  |
| 305                                                         | HPV last for years?                                                     | 1. Yes 2. No 3. I don't know |  |
| 306                                                         | Cervical cancer is caused by persistent HPV infection?                  | 1. Yes 2. No 3. I don't know |  |
| 307                                                         | HPV may infect both men and women?                                      | 1. Yes 2. No 3. I don't know |  |
| 308                                                         | Most HPV infection resolves spontaneously?                              | 1. Yes 2. No 3. I don't know |  |
| 309                                                         | HPV can infect you without symptoms?                                    | 1. Yes 2. No 3. I don't know |  |
| 310                                                         | HPV can cause genital ulcer?                                            | 1. Yes 2. No 3. I don't know |  |
| 311                                                         | HPV can cause other anogenital cancer(penis, anus)                      | 1. Yes 2. No 3. I don't know |  |
| 312                                                         | HPV vaccine prevents around 70% cervical cancer                         | 1. Yes 2. No 3. I don't know |  |
| 313                                                         | Pap-smear can screen cervical cancer.                                   | 1. Yes 2. No 3. I don't know |  |
| 314                                                         | Pap-smear is very or relatively effective in screening cervical cancer. | 1. Yes 2. No 3. I don't know |  |
| 315                                                         | Pap-smear should be done every 3 years.                                 | 1. Yes 2. No 3. I don't know |  |
| 316                                                         | Pap-smear can be done the age of 35 and above                           | 1. Yes 2. No 3. I don't know |  |

| Part 4: Attitude towards HPV infection |                                                                                             |              |  |
|----------------------------------------|---------------------------------------------------------------------------------------------|--------------|--|
| 401                                    | Cervical cancer is a severe disease?                                                        | 1. Yes 2. No |  |
| 402                                    | Cervical cancer is preventable disease?                                                     | 1. Yes 2. No |  |
| 403                                    | Do you think your daughter is susceptible to HPV infection?                                 | 1. Yes 2. No |  |
| 404                                    | HPV vaccine is helpful to prevent cervical cancer?                                          | 1. Yes 2. No |  |
| 405                                    | Do you think HPV vaccine is safe?                                                           | 1. Yes 2. No |  |
| 406                                    | There is less risk involved in being vaccinated than in having HPV infection?               | 1. Yes 2. No |  |
| 407                                    | HPV vaccine will not lead to complicated sexual activities                                  | 1. Yes 2. No |  |
| 408                                    | Vaccinating your Daughter against HPV would not encourage them to become sexual active      | 1. Yes 2. No |  |
| 409                                    | I would not want my children to be infected with HPV.                                       | 1. Yes 2. No |  |
| 410                                    | I would have my children vaccinated against HPV if the vaccination is freely available.     | 1. Yes 2. No |  |
| 411                                    | Information on HPV helps me to decide whether my children should be vaccinated against HPV. | 1. Yes 2. No |  |

|     |                                                  |                                                  |  |
|-----|--------------------------------------------------|--------------------------------------------------|--|
| 412 | What do you think about the price of HPV vaccine | 1. Fare price<br>2.expensive<br>3.very expensive |  |
|-----|--------------------------------------------------|--------------------------------------------------|--|

| <b>Part 5. Information HPV vaccine</b> |                                                       |                                                                                                                        |  |
|----------------------------------------|-------------------------------------------------------|------------------------------------------------------------------------------------------------------------------------|--|
| 501                                    | Do you hear about HPV infection before this study     | 1.yes 2.No                                                                                                             |  |
| 502                                    | Who told you about HPV?                               | 1.friend<br>2-telvision<br>3- Social network /internet<br>4.nurses<br>5-Doctors<br>6-other                             |  |
| 503                                    | What is your trusted source of information about HPV? | 1. Health extension worker<br>2.News paper<br>3. Radio<br>4.Website<br>5.Televisision<br>6.Relative/friends/colleagues |  |

| <b>Part 6. Acceptance of HPV vaccine</b> |                                                                                                         |              |  |
|------------------------------------------|---------------------------------------------------------------------------------------------------------|--------------|--|
| 601                                      | Are you willing to vaccinate your daughter for HPV vaccination which can protect against HPV infection? | 1. Yes 2. No |  |

**Thank you**
